# Supplementary material for: Metal ion-supported mesoporous silica materials for the removal of sulfamethizole from water
Source: Royal Society of Chemistry journal article supplement (doi:10.1039/d4nj01523a), 2024-01-01
Supplement: d4nj01523a1.pdf [file d4nj01523a1.pdf]

## Supplementary Information

### Metal ion supported mesoporous silica materials for the removal of sulfamethizole from water

Ni Yan,<sup>#</sup> Long-Hui Duan,<sup>#</sup> Min He, Wen Luo, Zhitong Ou and Jing Wang\*

School of Chemistry and Chemical Engineering, Guangxi University, Nanning  
530004, PR China

<sup>#</sup>These authors contributed equally to this work.

Corresponding author, e-mail: [wjwyj82@gxu.edu.cn](mailto:wjwyj82@gxu.edu.cn)

**Table. S1** Structural parameters of Ni-AAPTMS-SBA-15.

| Materials        | BET surface<br>area (m <sup>2</sup> /g) | Average pore<br>diameter (Å) | Total pore volume<br>(cm <sup>3</sup> /g) |
|------------------|-----------------------------------------|------------------------------|-------------------------------------------|
| AAPTMS-SBA-15[1] | 212.6                                   | 126.3                        | 0.67                                      |
| Ni-AAPTMS-SBA-15 | 142.7                                   | 123.5                        | 0.37                                      |

**Table. S2** Kinetic parameters of Ni-AAPTMS-SBA-15 for SIZ adsorption.

| Kinetic models | R <sup>2</sup> | K      | Q <sub>e, Cal</sub> (mg/g) |
|----------------|----------------|--------|----------------------------|
| PFO            | 0.9886         | 0.0006 | 3.99                       |
| PSO            | 0.9997         | 0.0379 | 31.45                      |

**Table. S3** Isotherm parameters of Ni-AAPTMS-SBA-15 for SIZ adsorption

| Langmuir                 |                          |                | Freundlich              |      |                | Temkin         |                           |                | Dubinin-Radushkevich     |               |                |
|--------------------------|--------------------------|----------------|-------------------------|------|----------------|----------------|---------------------------|----------------|--------------------------|---------------|----------------|
| Q <sub>m</sub><br>(mg/g) | K <sub>L</sub><br>(L/mg) | R <sup>2</sup> | K <sub>F</sub><br>(L/g) | n    | R <sup>2</sup> | B <sub>1</sub> | K <sub>T</sub><br>(L/mol) | R <sup>2</sup> | Q <sub>m</sub><br>(mg/g) | E<br>(kJ/mol) | R <sup>2</sup> |
| 188.68                   | 0.04                     | 0.9902         | 15.75                   | 1.78 | 0.9970         | 39.19          | 0.49                      | 0.9851         | 169.81                   | 21.32         | 0.9346         |

**Table S4** Comparison of Ni-AAPTMS-SBA-15 with other reported SAs adsorbents.

| Materials                | Targets | Equilibrium<br>time (min) | Q <sub>max</sub><br>(mg/g) | Removal<br>efficiency (%) | Ref.      |
|--------------------------|---------|---------------------------|----------------------------|---------------------------|-----------|
| Carbonaceous nanospheres | SDZ     | 40                        | 96.6                       | 96.8                      | [2]       |
| HKUST-1@CNS              | SMZ     | 120                       | 31.64                      | 96.1                      | [3]       |
| Fe-N-BC                  | SMZ     | 480                       | 42.9                       | 93.4                      | [4]       |
| BCN                      | SMZ     | 30                        | 28.75                      | -                         | [5]       |
| Activated Carbon         | SDZ     | 60                        | 66.22                      | 99                        | [6]       |
| CD-DGO                   | SMZ     | 120                       | 143.08                     | -                         | [7]       |
|                          | SDZ     | 120                       | 149.01                     | -                         |           |
| Ni-AAPTMS-SBA-15         | SIZ     | 2                         | 188.68                     | 90                        | This work |

## References

- [1] Y. Zhou, J. Wang, Q. Zhao, H. Cai, H. Zhang, Selective adsorption and removal of Congo red based on ethylenediamine functionalized mesoporous silica. *Chemistryselect*, 7(2022), e202203280.
- [2] X. Hu, Y. Huang, Z. Pan, S. Li, Q. Li, W. Lin, Preparation of carbonyl, hydroxyl, and amino-functionalized microporous carbonaceous nanospheres from syrup-based waste to remove sulfamethazine, *Environmental Science and Pollution Research* 29 (2022) 27688-27702.
- [3] G. Jain, P. Bhattacharyya, M.K. Mandal, R.G. Chaudhuri, S. Chakrabarti, pH-dependent adsorption of the sulfamethoxazole antibiotic on HKUST-1@CNS nanocomposite corroborating efficiency, mechanistic, and kinetic studies, *New Journal of Chemistry* 48 (2024) 1781-1791.
- [4] Y. Diao, R. Shan, M. Li, J. Gu, H. Yuan, Y. Chen, Efficient adsorption of a sulfonamide antibiotic in aqueous solutions with N-doped magnetic biochar: performance, mechanism, and reusability, *ACS Omega* 8 (2022) 879-892.
- [5] Y. Sun, J. Bian, Q. Zhu, Sulfamethoxazole removal of adsorption by carbon – Doped boron nitride in water, *Journal of Molecular Liquids* 349 (2022) 118216.
- [6] S. Aslan, M. Şirazi, Adsorption of sulfonamide antibiotic onto activated carbon

prepared from an agro-industrial by-product as low-cost adsorbent: equilibrium, thermodynamic, and kinetic studies, *Water Air and Soil Pollution* 231 (2020) 222.

[7] H. Yu, K. Zheng, X. Xu, X. Liu, B. Zhao, H. Ding, Z. Yu, C. Deng, Preparation of  $\beta$ -cyclodextrin/dopamine hydrochloride-graphene oxide and its adsorption properties for sulfonamide antibiotics, *Environmental Science and Pollution Research* 29 (2022) 70192-70201.

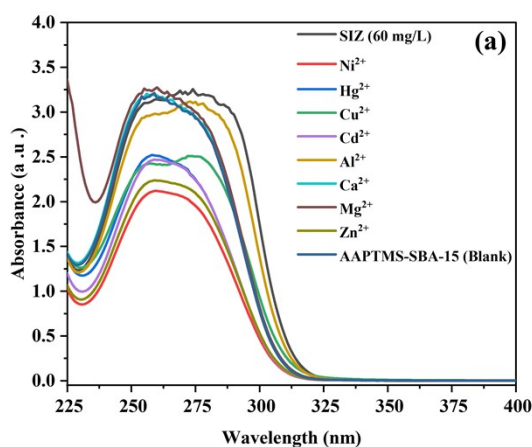

**Fig. S1** The adsorption of SIZ by AAPTMS-SBA-15 in the absence and presence of different metal ions.

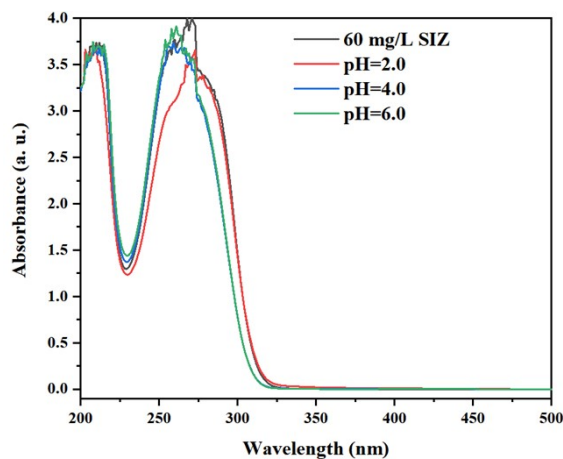

**Fig. S2** The adsorption of SIZ by AAPTMS-SBA-15 at different pH.

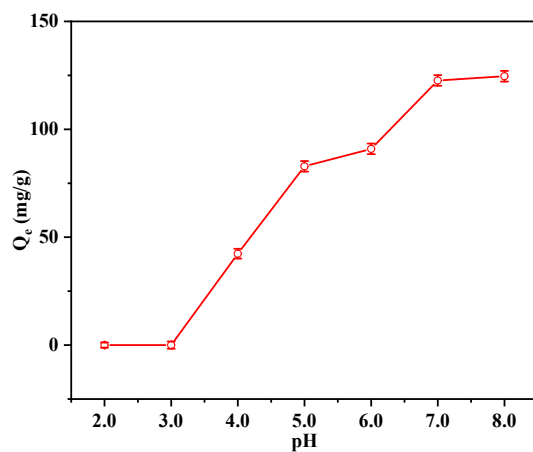

**Fig. S3** The adsorption capacity of Ni<sup>2+</sup> by AAPTMS-SBA-15 at different pH values.

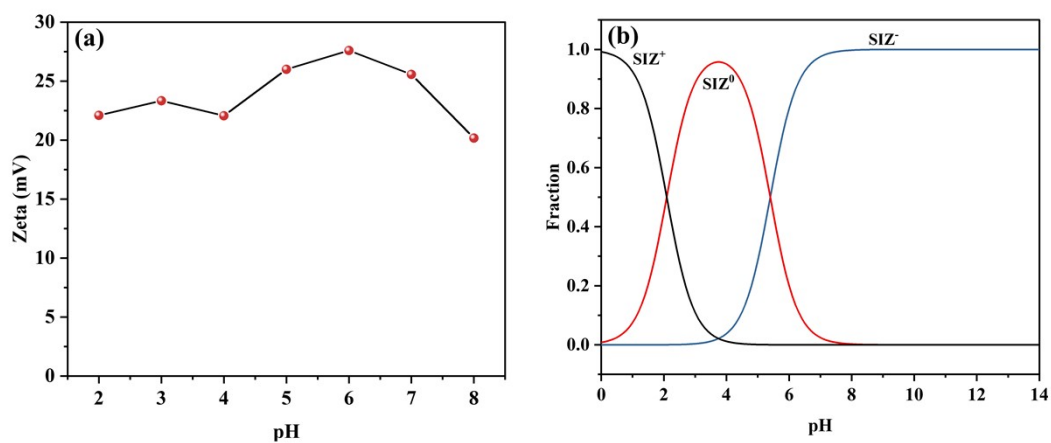

**Fig. S4** Zeta potential of Ni-AAPTMS-SBA-15 and the distribution coefficient of SIZ at different pH values.

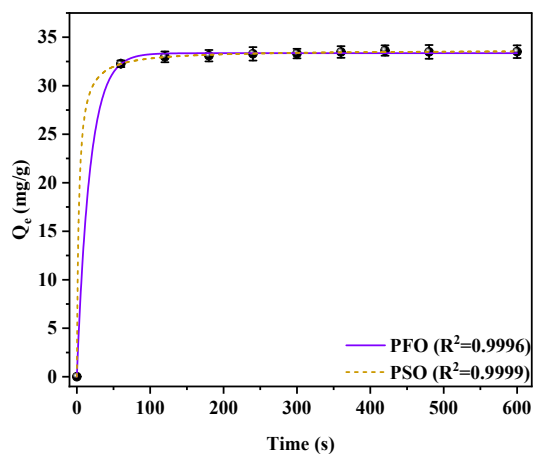

**Fig. S5** Nonlinear fitting of adsorption kinetics of SIZ by Ni-AAPTMS-SBA-15.

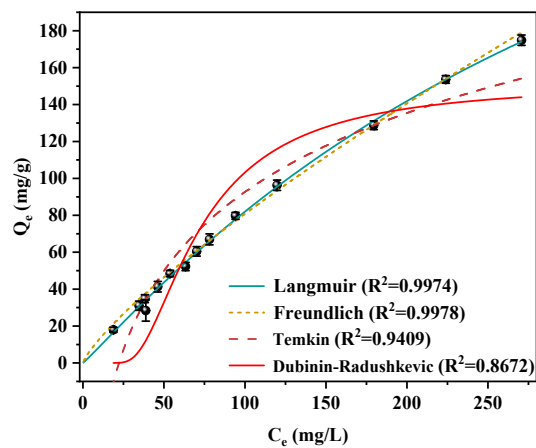

**Fig. S6** The effect of concentration on SIZ adsorption and its nonlinear fitting.

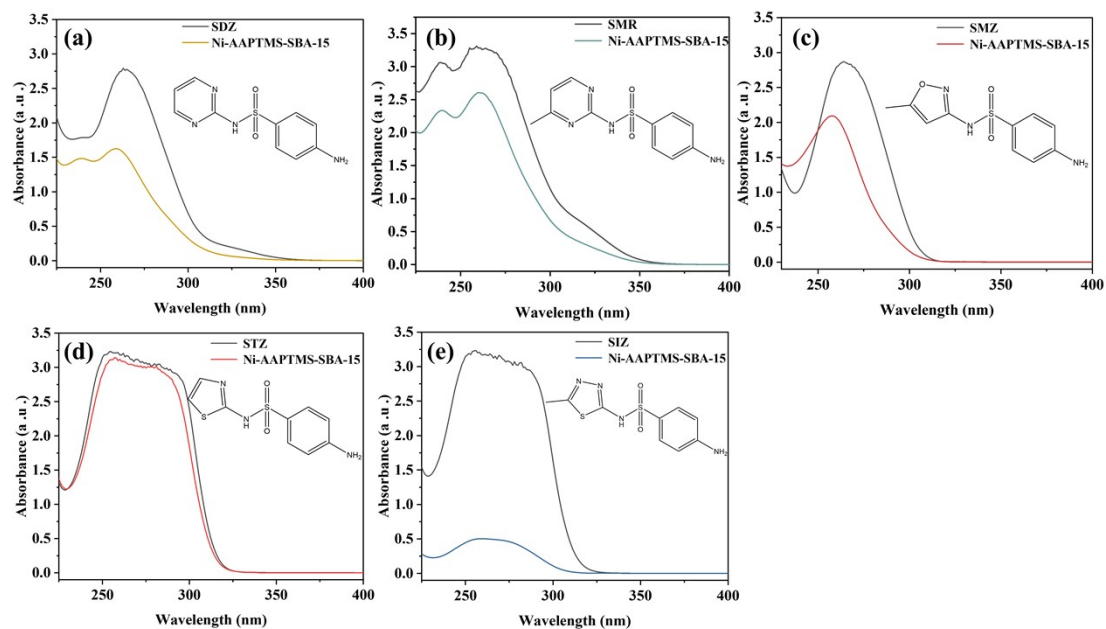

**Fig. S7** UV-Vis spectra of SDZ (a), SMR (b), SMZ (c), STZ (d), and SIZ (e) after adsorption by using Ni-AAPTMS-SBA-15.

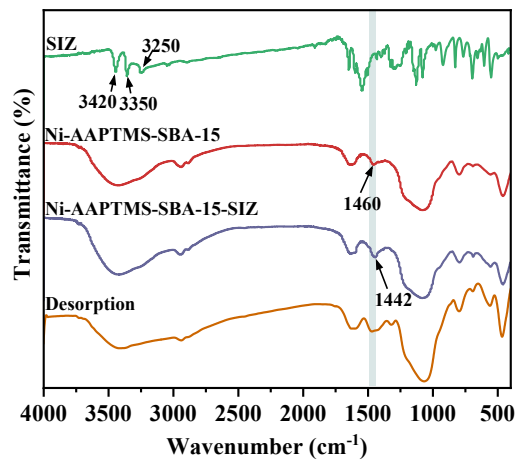

**Fig. S8** FT-IR spectra of Ni-AAPTMS-SBA-15 before and after adsorption of SIZ.

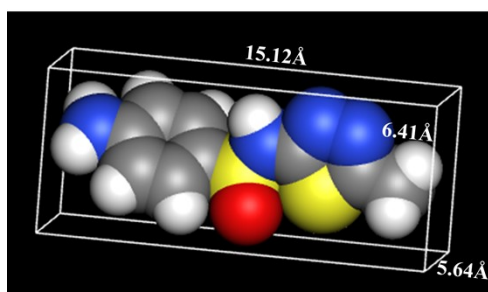

**Fig. S9** The size information of SIZ.

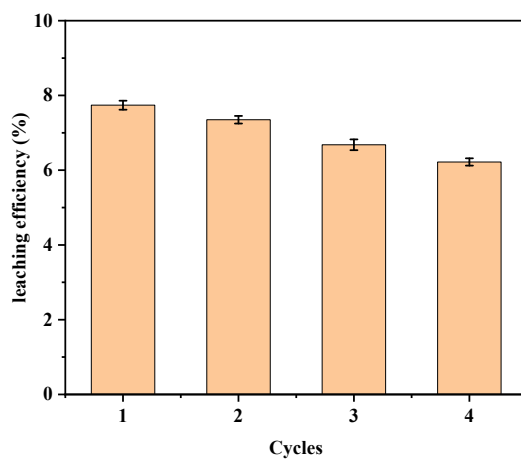

**Fig. S10** Leaching efficiency after regeneration.
